# Supplementary material for: TP53 codon 72 polymorphism may predict early tumour progression in paediatric pilocytic astrocytoma
Source: PubMed Central journal article supplement (PMC5216988; doi:10.18632/oncotarget.10295), 2016-06-25
Supplement: oncotarget-07-47918-s001.pdf [file oncotarget-07-47918-s001.pdf]

## TP53 codon 72 polymorphism may predict early tumour progression in paediatric pilocytic astrocytoma

### Supplementary Materials

**Supplementary Table 1: Number (and percentage) of deaths or disease progression in PA in European patients ( $n = 138$ ) ( $n = 17$ ; 12.3%)**

|                                                            | No. of deaths/disease progression (%) | IR $\times$ 1000 p-m | <i>p</i> value Log-Rank |
|------------------------------------------------------------|---------------------------------------|----------------------|-------------------------|
| Gender: Male ( $n = 74$ )                                  | 5 (6.8%)                              | 1.267 (0.527–3.043)  | 0.031                   |
| Female ( $n = 64$ )                                        | 12 (18.7%)                            | 3.977 (2.259–7.003)  |                         |
| Age at diagnosis: $\leq 24$ months ( $n = 15$ )            | 4(26.7%)                              | 4.658 (1.748–12.412) | 0.098                   |
| $> 24$ months ( $n = 123$ )                                | 13 (10.6%)                            | 2.129 (1.236–3.667)  |                         |
| Site of lesion: Supratentorial ( $n = 40$ )                | 8 (20.0%)                             | 3.422 (1.711–6.843)  | 0.150                   |
| Infratentorial ( $n = 98$ )                                | 9 (9.2)                               | 1.945 (1.012–3.738)  |                         |
| Extent of resection: Subtotal resection (STR) ( $n = 46$ ) | 14 (30.4%)                            | 7.246 (4.291–12.234) | *0.0001                 |
| Gross total resection (GTR) ( $n = 80$ )                   | 3 (3.7%)                              | 0.889 (0.287–2.758)  |                         |
| p53 Arg72Pro, (dominant model): Arg/Arg ( $n = 65$ )       | 9 (13.8%)                             | 2.922 (1.520–5.616)  | 0.469                   |
| Arg/Pro or Pro/Pro ( $n = 73$ )                            | 8 (11.0%)                             | 2.059 (1.030–4.118)  |                         |

\*significant *p* values

**Supplementary Table 2: Number of deaths/disease progression (and percentage) and EFS: IR for progression in mixed neuronal and glial tumors ( $n = 11$ ) who underwent to STR with selected clinical features, in correlation with p53 Arg72Pro SNP**

|                                                    | No. of deaths/disease progression (%) | EFS IR $\times$ 1000 p-m | <i>p</i> value Log-Rank |
|----------------------------------------------------|---------------------------------------|--------------------------|-------------------------|
| p53 Arg72Pro (dominant model): Arg/Arg ( $n = 5$ ) | 2 (40.0)                              | 6.282 (1.571–25.118)     | 0.30                    |
| Arg/Pro or Pro/Pro ( $n = 6$ )                     | 3 (50.0)                              | 10.341 (3.335–32.062)    |                         |

IR  $\times$  1000 p-m: Incidence Rate  $\times$  1000 person-months; \*significant *p* values

**Supplementary Table 3: Clinicopathological data of the cohort (n = 170)**

| Characteristic                                |                                  | No.                               | %        |      |
|-----------------------------------------------|----------------------------------|-----------------------------------|----------|------|
| Median age (years) - (1st-3rd q)              |                                  | 7.0 (3.0–11.0)                    |          |      |
| Age ≤ 24 months: –No. – (%)                   |                                  | 24 (14.1%)                        |          |      |
| Median (1st-3rd q) of follow-up time (years): |                                  | 2.7 (0.8–8.4)                     |          |      |
|                                               |                                  | <b>No.</b>                        | <b>%</b> |      |
| Gender                                        | Male                             | 88                                | 51.8     |      |
|                                               | Female                           | 82                                | 48.2     |      |
| Histology                                     | Pilocytic astrocytomas           | 139                               | 81.8     |      |
|                                               | Mixed neuronal and glial tumours | 31                                | 18.2     |      |
| Site of lesion                                | Cerebellum                       | 65                                | 38.2     |      |
|                                               | Cerebral hemisphere              | 35                                | 20.6     |      |
|                                               | Optic pathway/hypothalamus       | 19                                | 11.2     |      |
|                                               | Thalamus/mesencephalic           | 12                                | 7.1      |      |
|                                               | Brainstem/spinal cord            | 26                                | 15.3     |      |
|                                               | 4th ventricle                    | 5                                 | 2.9      |      |
|                                               | Cerebellum peduncle              | 2                                 | 1.2      |      |
|                                               | Unspecified posterior fossa      | 6                                 | 3.5      |      |
|                                               | Extent of resection <sup>a</sup> | Gross total resection (GTR)       | 100      | 63.3 |
|                                               |                                  | Partial resection or biopsy (STR) | 58       | 36.7 |
| Adjuvant treatment <sup>b</sup>               | yes                              | 33                                | 19.4     |      |
| EFS                                           | With stable disease              | 144/169                           | 85.2     |      |
|                                               | disease progression              | 25/169                            | 14.8     |      |

<sup>a</sup>for 12 case surgical information is not available; <sup>b</sup>adjuvant therapies information is missing for 21 cases.
